# Supplementary material for: What do people know and think about medical overuse? an online questionnaire study in Germany
Source: PubMed Central journal article supplement (PMC10919641; doi:10.1371/journal.pone.0299907), 2024-03-07
Supplement: pone.0299907.s010.pdf [file pone.0299907.s010.pdf]

| Variable                             | Questionnaire Item | Description                                                                                                                                                                                                          | Values                                                                              | Type            | Rules                                                    |
|--------------------------------------|--------------------|----------------------------------------------------------------------------------------------------------------------------------------------------------------------------------------------------------------------|-------------------------------------------------------------------------------------|-----------------|----------------------------------------------------------|
| record_id                            |                    | REDCap ID                                                                                                                                                                                                            |                                                                                     |                 |                                                          |
| redcap_survey_identifier             |                    | timestamp of survey                                                                                                                                                                                                  |                                                                                     |                 |                                                          |
| studie_zu_berversorgung_fb_timestamp |                    | timestamp of survey                                                                                                                                                                                                  |                                                                                     |                 |                                                          |
| agreement                            | 1                  | I declare my consent to participate in the study and to the storage of my answers. I agree with the privacy policy.                                                                                                  | 1: Yes<br>0: No                                                                     | Singe Choice    | If '0', jump to end_1                                    |
| end_1                                | 2                  | Thank you for showing interest in our survey. Without your consent to the participation and privacy policy, participation is unfortunately not possible. You can change your selection again or end the survey here. | 1: I would like to change my consent<br>0: I would now like to end the questioning. | Singe Choice    | If '1', jump to agreement_2<br>If '0', jump to end_2a    |
| agreement_2                          | 3                  | I give my consent to participate in the study and to the storage of my answers. I agree with the privacy policy.                                                                                                     | 1: Yes                                                                              | Singe Choice    | If '1', jump to insurance                                |
| insurance                            | 4                  | Are you insured under the statutory or private health insurance scheme?                                                                                                                                              | 1: Private<br>0: Statutory                                                          | Singe Choice    |                                                          |
|                                      | 5                  | <b>Which physicians have you seen in the last three months?</b>                                                                                                                                                      |                                                                                     | Multiple choice |                                                          |
| doctor_0                             | 5                  | No visit to the physician                                                                                                                                                                                            | 1: Yes<br>0: No                                                                     |                 | Default: '0'<br>If '1', clear doctor_1 to doctor_14      |
| doctor_1                             | 5                  | Family doctor                                                                                                                                                                                                        | 1: Yes<br>0: No                                                                     |                 | Default: '0'                                             |
| doctor_2                             | 5                  | Internist (e.g. cardiologist, gastroenterologist, ...)                                                                                                                                                               | 1: Yes<br>0: No                                                                     |                 | Default: '0'                                             |
| doctor_3                             | 5                  | Oncologist                                                                                                                                                                                                           | 1: Yes<br>0: No                                                                     |                 | Default: '0'                                             |
| doctor_4                             | 5                  | Orthopedist                                                                                                                                                                                                          | 1: Yes<br>0: No                                                                     |                 | Default: '0'                                             |
| doctor_5                             | 5                  | Urologist                                                                                                                                                                                                            | 1: Yes<br>0: No                                                                     |                 | Default: '0'                                             |
| doctor_6                             | 5                  | Gynecologist                                                                                                                                                                                                         | 1: Yes<br>0: No                                                                     |                 | Default: '0'                                             |
| doctor_7                             | 5                  | Radiologist                                                                                                                                                                                                          | 1: Yes<br>0: No                                                                     |                 | Default: '0'                                             |
| doctor_8                             | 5                  | Psychiatrist or psychotherapist                                                                                                                                                                                      | 1: Yes<br>0: No                                                                     |                 | Default: '0'                                             |
| doctor_9                             | 5                  | Ear, nose and throat specialist                                                                                                                                                                                      | 1: Yes<br>0: No                                                                     |                 | Default: '0'                                             |
| doctor_10                            | 5                  | Dermatologist                                                                                                                                                                                                        | 1: Yes<br>0: No                                                                     |                 | Default: '0'                                             |
| doctor_11                            | 5                  | Neurologist                                                                                                                                                                                                          | 1: Yes<br>0: No                                                                     |                 | Default: '0'                                             |
| doctor_12                            | 5                  | Dentist or oral surgeon                                                                                                                                                                                              | 1: Yes<br>0: No                                                                     |                 | Default: '0'                                             |
| doctor_13                            | 5                  | Eye specialist                                                                                                                                                                                                       | 1: Yes<br>0: No                                                                     |                 | Default: '0'                                             |
| doctor_14                            | 5                  | Other specialty                                                                                                                                                                                                      | 1: Yes<br>0: No                                                                     |                 | Default: '0'                                             |
| doctor_patient                       | 6                  | How are decisions about treatment and tests made during your appointments with your physician?                                                                                                                       | 0: Decision is made by the physician<br>100: Decision is made only by myself        | Slider          |                                                          |
| overuse_1                            | 7                  | Have you ever heard of medical overuse?                                                                                                                                                                              | 1: Yes<br>0: No                                                                     | Singe Choice    | If '1', jump to overuse_2a<br>If '0', jump to overuse_2b |
| overuse_2a                           | 8                  | What do you think overuse means?                                                                                                                                                                                     |                                                                                     | Free text field |                                                          |
| overuse_2b                           | 9                  | What do you think could be meant with overuse?                                                                                                                                                                       |                                                                                     | Free text field |                                                          |
|                                      | 10                 | <b>How much do you agree with the following statements?</b>                                                                                                                                                          |                                                                                     |                 |                                                          |
| overuse_4a                           | 10                 | Overuse involves treating conditions beyond what is necessary.                                                                                                                                                       | 1: Totally disagree<br>2: Rather disagree<br>3: Rather agree<br>4: Totally agree    | Singe Choice    |                                                          |
| overuse_4b                           | 10                 | Overuse means the rapid initiation of medical procedures without waiting for self-healing.                                                                                                                           | 1: Totally disagree<br>2: Rather disagree<br>3: Rather agree<br>4: Totally agree    | Singe Choice    |                                                          |

| Variable                                                                                                                                                                        | Questionnaire Item | Description                                                                                                  | Values                                                                                                                                                                                                                                                                   | Type            | Rules                                                   |
|---------------------------------------------------------------------------------------------------------------------------------------------------------------------------------|--------------------|--------------------------------------------------------------------------------------------------------------|--------------------------------------------------------------------------------------------------------------------------------------------------------------------------------------------------------------------------------------------------------------------------|-----------------|---------------------------------------------------------|
| overuse_4c                                                                                                                                                                      | 10                 | Overuse is treatment that would not be strictly necessary for medical reasons.                               | 1: Totally disagree<br>2: Rather disagree<br>3: Rather agree<br>4: Totally agree                                                                                                                                                                                         | Singe Choice    |                                                         |
| overuse_4d                                                                                                                                                                      | 10                 | Overuse refers to procedures that are carried out primarily for financial reasons.                           | 1: Totally disagree<br>2: Rather disagree<br>3: Rather agree<br>4: Totally agree                                                                                                                                                                                         | Singe Choice    |                                                         |
| <b>In the German health care system, overuse is defined as "care that exceeds the individual needs of the patient. This includes services without benefit for the patient".</b> |                    |                                                                                                              |                                                                                                                                                                                                                                                                          |                 |                                                         |
| overuse_5                                                                                                                                                                       | 11                 | Have you already experienced or perceived overuse according to this definition?                              | 1: Yes<br>0: No                                                                                                                                                                                                                                                          | Singe Choice    |                                                         |
| overuse_6                                                                                                                                                                       | 12                 | How would you rate the importance of overuse? Please select the answer you agree with the most.              | 0: Medical overuse does not exist in our health system.<br>1: Medical overuse exists but it does not have a negative impact on healthcare provision.<br>2: There are other issues that need to be addressed.<br>3: Less medical overuse would improve our health system. | Singe Choice    |                                                         |
| <b>13 In which medical services do you suspect overuse? Please mark the two areas in which you most frequently suspect overuse.</b>                                             |                    |                                                                                                              |                                                                                                                                                                                                                                                                          | Multiple choice | Only allow two selections in overuse_7_0 to overuse_7_5 |
| overuse_7_0                                                                                                                                                                     | 13                 | Early detection and screening (e.g. cancer screening)                                                        | 1: Yes<br>0: No                                                                                                                                                                                                                                                          |                 | Default: '0'                                            |
| overuse_7_1                                                                                                                                                                     | 13                 | Prescription of medicine                                                                                     | 1: Yes<br>0: No                                                                                                                                                                                                                                                          |                 | Default: '0'                                            |
| overuse_7_2                                                                                                                                                                     | 13                 | Surgeries                                                                                                    | 1: Yes<br>0: No                                                                                                                                                                                                                                                          |                 | Default: '0'                                            |
| overuse_7_3                                                                                                                                                                     | 13                 | Individual health services (IGeL)                                                                            | 1: Yes<br>0: No                                                                                                                                                                                                                                                          |                 | Default: '0'                                            |
| overuse_7_4                                                                                                                                                                     | 13                 | Imaging procedures (e.g. ultrasound, X-ray, ...)                                                             | 1: Yes<br>0: No                                                                                                                                                                                                                                                          |                 | Default: '0'                                            |
| overuse_7_5                                                                                                                                                                     | 13                 | Blood tests                                                                                                  | 1: Yes<br>0: No                                                                                                                                                                                                                                                          |                 | Default: '0'                                            |
| <b>14 Please indicate which group of people you suspect are more likely to be affected by overuse?</b>                                                                          |                    |                                                                                                              |                                                                                                                                                                                                                                                                          |                 |                                                         |
| overuse_8a                                                                                                                                                                      | 14                 | People with private health insurance are more often affected than those with statutory health insurance.     | 1: Totally disagree<br>2: Rather disagree<br>3: Rather agree<br>4: Totally agree                                                                                                                                                                                         | Singe Choice    |                                                         |
| overuse_8b                                                                                                                                                                      | 14                 | People with a higher level of education are more often affected than people with a lower level of education. | 1: Totally disagree<br>2: Rather disagree<br>3: Rather agree<br>4: Totally agree                                                                                                                                                                                         | Singe Choice    |                                                         |
| overuse_8c                                                                                                                                                                      | 14                 | People with higher income are more often affected than people with lower income.                             | 1: Totally disagree<br>2: Rather disagree<br>3: Rather agree<br>4: Totally agree                                                                                                                                                                                         | Singe Choice    |                                                         |
| overuse_8d                                                                                                                                                                      | 14                 | Younger people are more often affected than older people (e.g. pensioners).                                  | 1: Totally disagree<br>2: Rather disagree<br>3: Rather agree<br>4: Totally agree                                                                                                                                                                                         | Singe Choice    |                                                         |
| <b>15 Where do you rather suspect causes for too much medicine?</b>                                                                                                             |                    |                                                                                                              |                                                                                                                                                                                                                                                                          |                 |                                                         |

| Variable   | Questionnaire Item | Description                                                                                          | Values                                                                           | Type         | Rules |
|------------|--------------------|------------------------------------------------------------------------------------------------------|----------------------------------------------------------------------------------|--------------|-------|
| reasons_1  | 15                 | I perceive a physician as more competent the more tests he performs.                                 | 1: Totally disagree<br>2: Rather disagree<br>3: Rather agree<br>4: Totally agree | Singe Choice |       |
| reasons_2  | 15                 | Willingness to act and actions are more likely to satisfy me than words and waiting.                 | 1: Totally disagree<br>2: Rather disagree<br>3: Rather agree<br>4: Totally agree | Singe Choice |       |
| reasons_3  | 15                 | In my opinion, it is better to exam-ine more than to miss something.                                 | 1: Totally disagree<br>2: Rather disagree<br>3: Rather agree<br>4: Totally agree | Singe Choice |       |
| reasons_4  | 15                 | Lawsuits lead to overuse, because physicians consequently want to protect themselves diagnostically. | 1: Totally disagree<br>2: Rather disagree<br>3: Rather agree<br>4: Totally agree | Singe Choice |       |
| reasons_5  | 15                 | Clarifying the benefits and harms of tests and treatments to patients fails due to time constraints. | 1: Totally disagree<br>2: Rather disagree<br>3: Rather agree<br>4: Totally agree | Singe Choice |       |
| reasons_6  | 15                 | If medical equipment is available in practices and clinics, it is used.                              | 1: Totally disagree<br>2: Rather disagree<br>3: Rather agree<br>4: Totally agree | Singe Choice |       |
| reasons_7  | 15                 | When different physicians do not coordinate well in treating a patient, more services are provided.  | 1: Totally disagree<br>2: Rather disagree<br>3: Rather agree<br>4: Totally agree | Singe Choice |       |
| reasons_8  | 15                 | Payment for a diagnostic meas-ure/treatment also determines how often it is used.                    | 1: Totally disagree<br>2: Rather disagree<br>3: Rather agree<br>4: Totally agree | Singe Choice |       |
| reasons_9  | 15                 | Being stressed leads physicians to order tests more quickly.                                         | 1: Totally disagree<br>2: Rather disagree<br>3: Rather agree<br>4: Totally agree | Singe Choice |       |
| reasons_10 | 15                 | Patients also request medical procedures.                                                            | 1: Totally disagree<br>2: Rather disagree<br>3: Rather agree<br>4: Totally agree | Singe Choice |       |
| reasons_11 | 15                 | If physicians are inexperienced, they are more likely to order tests.                                | 1: Totally disagree<br>2: Rather disagree<br>3: Rather agree<br>4: Totally agree | Singe Choice |       |
|            |                    | <b>16 What do you suspect might be consequences of too much medicine and overuse?</b>                |                                                                                  |              |       |
| cons_1     | 16                 | I cannot imagine at all that there is really too much medicine.                                      | 1: Totally disagree<br>2: Rather disagree<br>3: Rather agree<br>4: Totally agree | Singe Choice |       |
| cons_2     | 16                 | I do not believe that medicine can cause harm.                                                       | 1: Totally disagree<br>2: Rather disagree<br>3: Rather agree<br>4: Totally agree | Singe Choice |       |
| cons_3     | 16                 | The physical well-being of the patients could be endangered.                                         | 1: Totally disagree<br>2: Rather disagree<br>3: Rather agree<br>4: Totally agree | Singe Choice |       |

| Variable                                                                                                                        | Questionnaire Item | Description                                                                                             | Values                                                                           | Type            | Rules        |
|---------------------------------------------------------------------------------------------------------------------------------|--------------------|---------------------------------------------------------------------------------------------------------|----------------------------------------------------------------------------------|-----------------|--------------|
| cons_4                                                                                                                          | 16                 | The mental well-being of patients could be endangered.                                                  | 1: Totally disagree<br>2: Rather disagree<br>3: Rather agree<br>4: Totally agree | Singe Choice    |              |
| cons_5                                                                                                                          | 16                 | Patients might become distrustful towards physicians.                                                   | 1: Totally disagree<br>2: Rather disagree<br>3: Rather agree<br>4: Totally agree | Singe Choice    |              |
| cons_6                                                                                                                          | 16                 | Health care costs could rise, making health insurance premiums more and more expensive.                 | 1: Totally disagree<br>2: Rather disagree<br>3: Rather agree<br>4: Totally agree | Singe Choice    |              |
| cons_7                                                                                                                          | 16                 | The more medical treatments and tests are performed, the healthier people stay.                         | 1: Totally disagree<br>2: Rather disagree<br>3: Rather agree<br>4: Totally agree | Singe Choice    |              |
| <b>17 What measures do you think could contribute to adequate appropriate care?</b>                                             |                    |                                                                                                         |                                                                                  |                 |              |
| solution_1                                                                                                                      | 17                 | I think alternative healing methods need to be expanded.                                                | 1: Totally disagree<br>2: Rather disagree<br>3: Rather agree<br>4: Totally agree | Singe Choice    |              |
| solution_2                                                                                                                      | 17                 | Medical billing must be disclosed and audited more closely.                                             | 1: Totally disagree<br>2: Rather disagree<br>3: Rather agree<br>4: Totally agree | Singe Choice    |              |
| solution_3                                                                                                                      | 17                 | Patients need neutral information about treatment options.                                              | 1: Totally disagree<br>2: Rather disagree<br>3: Rather agree<br>4: Totally agree | Singe Choice    |              |
| solution_4                                                                                                                      | 17                 | We need more physicians who each treat a smaller number of patients.                                    | 1: Totally disagree<br>2: Rather disagree<br>3: Rather agree<br>4: Totally agree | Singe Choice    |              |
| solution_5                                                                                                                      | 17                 | The coexistence of statutory and private health insurance must be abolished.                            | 1: Totally disagree<br>2: Rather disagree<br>3: Rather agree<br>4: Totally agree | Singe Choice    |              |
| solution_6                                                                                                                      | 17                 | The exchange between different physicians and treatment providers must be improved.                     | 1: Totally disagree<br>2: Rather disagree<br>3: Rather agree<br>4: Totally agree | Singe Choice    |              |
| solution_7                                                                                                                      | 17                 | If patients had to contribute more to the cost of treatment, fewer examinations would be performed.     | 1: Totally disagree<br>2: Rather disagree<br>3: Rather agree<br>4: Totally agree | Singe Choice    |              |
| solution_8                                                                                                                      | 17                 | It should be mandatory for patients to see their family physician first when they have health problems. | 1: Totally disagree<br>2: Rather disagree<br>3: Rather agree<br>4: Totally agree | Singe Choice    |              |
| <b>18 The public is beginning to address overuse in a variety of ways. Which of the following cam-paigns have you heard of?</b> |                    |                                                                                                         |                                                                                  | Multiple choice |              |
| solution_11_0                                                                                                                   | 18                 | Choosing Wisely                                                                                         | 1: Yes<br>0: No                                                                  |                 | Default: '0' |
| solution_11_1                                                                                                                   | 18                 | Less is more                                                                                            | 1: Yes<br>0: No                                                                  |                 | Default: '0' |
| solution_11_2                                                                                                                   | 18                 | Klug entscheiden                                                                                        | 1: Yes<br>0: No                                                                  |                 | Default: '0' |

| Variable      | Questionnaire Item | Description                                                                                                    | Values                                                                                                                                                                                            | Type            | Rules                                                         |
|---------------|--------------------|----------------------------------------------------------------------------------------------------------------|---------------------------------------------------------------------------------------------------------------------------------------------------------------------------------------------------|-----------------|---------------------------------------------------------------|
| solution_11_3 | 18                 | Smarter Medicine                                                                                               | 1: Yes<br>0: No                                                                                                                                                                                   |                 | Default: '0'                                                  |
| solution_11_4 | 18                 | Quartäre Prävention                                                                                            | 1: Yes<br>0: No                                                                                                                                                                                   |                 | Default: '0'                                                  |
| solution_11_5 | 18                 | None of the above                                                                                              | 1: Yes<br>0: No                                                                                                                                                                                   |                 | Default: '0'                                                  |
| health_system | 19                 | Please think about the health care system in 10 years. Do you think it will be better or worse than it is now? | 0: System will be significantly worse<br>1: System will be slightly worse<br>2: System will be just as good as now<br>3: System will be slightly better<br>4: System will be significantly better | Singe Choice    |                                                               |
| gender        | 20                 | Please enter your gender                                                                                       | 0: Female<br>1: Male<br>2: Diverse                                                                                                                                                                | Singe Choice    |                                                               |
| age_group     | 21                 | Please indicate which age group you belong to.                                                                 | 0: 18 to 24 years<br>1: 25 to 44 years<br>2: 45 to 64 years<br>3: 65 years or older                                                                                                               | Singe Choice    |                                                               |
| qualification | 22                 | What is your highest professional qualification?                                                               | 0: No professional training (yet)<br>1: Professional training<br>2: (Technical) university degree (Bachelor, Master, Diploma, ...)                                                                | Singe Choice    |                                                               |
| employment    | 23                 | Please indicate the status of your employment. Employment is understood to mean any paid activity.             | 0: Not employed<br>1: In professional training/student<br>2: Employed (as employee/worker, civil servant, including mini-job)<br>3: Self-employed<br>4: Retired                                   | Singe Choice    |                                                               |
| residence     | 24                 | How many inhabitants does your place of residence have?                                                        | 0: Under 5,000<br>1: 5,000-20,000<br>2: 20,000-100,000<br>3: Over 100,000                                                                                                                         | Singe Choice    |                                                               |
|               | 25                 | <b>Which of the following health problems do you suffer from?</b>                                              |                                                                                                                                                                                                   | Multiple choice |                                                               |
| morbidity_1   |                    | Heart problems                                                                                                 | 1: Yes<br>0: No                                                                                                                                                                                   |                 | Default: '0'<br>If '1', open morbidity_1_0 to morbidity_1_3   |
| morbidity_2   |                    | Hypertension                                                                                                   | 1: Yes<br>0: No                                                                                                                                                                                   |                 | Default: '0'<br>If '1', open morbidity_2_0 to morbidity_2_3   |
| morbidity_3   |                    | Lung problems                                                                                                  | 1: Yes<br>0: No                                                                                                                                                                                   |                 | Default: '0'<br>If '1', open morbidity_3_0 to morbidity_3_3   |
| morbidity_4   |                    | Diabetes                                                                                                       | 1: Yes<br>0: No                                                                                                                                                                                   |                 | Default: '0'<br>If '1', open morbidity_4_0 to morbidity_4_3   |
| morbidity_5   |                    | Gastrointestinal problems                                                                                      | 1: Yes<br>0: No                                                                                                                                                                                   |                 | Default: '0'<br>If '1', open morbidity_5_0 to morbidity_5_3   |
| morbidity_6   |                    | Kidney problems                                                                                                | 1: Yes<br>0: No                                                                                                                                                                                   |                 | Default: '0'<br>If '1', open morbidity_6_0 to morbidity_6_3   |
| morbidity_7   |                    | Liver problems                                                                                                 | 1: Yes<br>0: No                                                                                                                                                                                   |                 | Default: '0'<br>If '1', open morbidity_7_0 to morbidity_7_3   |
| morbidity_8   |                    | Anemia                                                                                                         | 1: Yes<br>0: No                                                                                                                                                                                   |                 | Default: '0'<br>If '1', open morbidity_8_0 to morbidity_8_3   |
| morbidity_9   |                    | Coagulation disorder (e.g. thrombosis, embolism)                                                               | 1: Yes<br>0: No                                                                                                                                                                                   |                 | Default: '0'<br>If '1', open morbidity_9_0 to morbidity_9_3   |
| morbidity_10  |                    | Cancer                                                                                                         | 1: Yes<br>0: No                                                                                                                                                                                   |                 | Default: '0'<br>If '1', open morbidity_10_0 to morbidity_10_3 |
| morbidity_11  |                    | Depression                                                                                                     | 1: Yes<br>0: No                                                                                                                                                                                   |                 | Default: '0'<br>If '1', open morbidity_11_0 to morbidity_11_3 |
| morbidity_12  |                    | Arthrosis                                                                                                      | 1: Yes<br>0: No                                                                                                                                                                                   |                 | Default: '0'<br>If '1', open morbidity_12_0 to morbidity_12_3 |
| morbidity_13  |                    | Back pain                                                                                                      | 1: Yes<br>0: No                                                                                                                                                                                   |                 | Default: '0'<br>If '1', open morbidity_13_0 to morbidity_13_3 |

| Variable                                                                                                                                                                                                                                                                                                                     | Questionnaire Item | Description                                             | Values          | Type | Rules                                                                                          |
|------------------------------------------------------------------------------------------------------------------------------------------------------------------------------------------------------------------------------------------------------------------------------------------------------------------------------|--------------------|---------------------------------------------------------|-----------------|------|------------------------------------------------------------------------------------------------|
| morbidity_14                                                                                                                                                                                                                                                                                                                 |                    | Rheumatism or autoimmune disorder                       | 1: Yes<br>0: No |      | Default: '0'<br>If '1', open morbidity_14_0 to morbidity_14_3                                  |
| morbidity_15                                                                                                                                                                                                                                                                                                                 |                    | Allergies                                               | 1: Yes<br>0: No |      | Default: '0'<br>If '1', open morbidity_15_0 to morbidity_15_3                                  |
| morbidity_16                                                                                                                                                                                                                                                                                                                 |                    | Thyroid disease (hyper- or hypothyroidism)              | 1: Yes<br>0: No |      | Default: '0'<br>If '1', open morbidity_16_0 to morbidity_16_3                                  |
| morbidity_17                                                                                                                                                                                                                                                                                                                 |                    | None of the above                                       | 1: Yes<br>0: No |      | Default: '0'<br>If '1', clear morbidity_1 to morbidity_16 and jump to end_2a                   |
| morbidity_18                                                                                                                                                                                                                                                                                                                 |                    | No health problems                                      | 1: Yes<br>0: No |      | Default: '0'<br>If '1', clear morbidity_1 to morbidity_16 and jump to end_2a                   |
| <p><b>26 Please tick which of the previously selected complaints are chronic, for which complaints you regularly take medication and for which complaints you regularly go to the physician. You can tick more than one answer per complaint. Please tick "None of the above" if none of the three statements apply.</b></p> |                    |                                                         |                 |      |                                                                                                |
| morbidity_1_1                                                                                                                                                                                                                                                                                                                |                    | 26 Heart problems: chronic disease                      | 1: Yes<br>0: No |      | Default: '0'<br>Only show when morbidity_1 = 1                                                 |
| morbidity_1_2                                                                                                                                                                                                                                                                                                                |                    | 26 Heart problems: regular medication intake            | 1: Yes<br>0: No |      | Default: '0'<br>Only show when morbidity_1 = 1                                                 |
| morbidity_1_3                                                                                                                                                                                                                                                                                                                |                    | 26 Heart problems: regular physician visits             | 1: Yes<br>0: No |      | Default: '0'<br>Only show when morbidity_1 = 1                                                 |
| morbidity_1_0                                                                                                                                                                                                                                                                                                                |                    | 26 Heart problems: none of the above                    | 1: Yes<br>0: No |      | Default: '0'<br>Only show when morbidity_1 = 1<br>If '1', clear morbidity_1_1 to morbidity_1_3 |
| morbidity_2_1                                                                                                                                                                                                                                                                                                                |                    | 26 Hypertension: chronic disease                        | 1: Yes<br>0: No |      | Default: '0'<br>Only show when morbidity_2 = 1                                                 |
| morbidity_2_2                                                                                                                                                                                                                                                                                                                |                    | 26 Hypertension: regular medication intake              | 1: Yes<br>0: No |      | Default: '0'<br>Only show when morbidity_2 = 1                                                 |
| morbidity_2_3                                                                                                                                                                                                                                                                                                                |                    | 26 Hypertension: regular physician visits               | 1: Yes<br>0: No |      | Default: '0'<br>Only show when morbidity_2 = 1                                                 |
| morbidity_2_0                                                                                                                                                                                                                                                                                                                |                    | 26 Hypertension: none of the above                      | 1: Yes<br>0: No |      | Default: '0'<br>Only show when morbidity_2 = 1<br>If '1', clear morbidity_2_1 to morbidity_2_3 |
| morbidity_3_1                                                                                                                                                                                                                                                                                                                |                    | 26 Lung problems: chronic disease                       | 1: Yes<br>0: No |      | Default: '0'<br>Only show when morbidity_3 = 1                                                 |
| morbidity_3_2                                                                                                                                                                                                                                                                                                                |                    | 26 Lung problems: regular medication intake             | 1: Yes<br>0: No |      | Default: '0'<br>Only show when morbidity_3 = 1                                                 |
| morbidity_3_3                                                                                                                                                                                                                                                                                                                |                    | 26 Lung problems: regular physician visits              | 1: Yes<br>0: No |      | Default: '0'<br>Only show when morbidity_3 = 1                                                 |
| morbidity_3_0                                                                                                                                                                                                                                                                                                                |                    | 26 Lung problems: none of the above                     | 1: Yes<br>0: No |      | Default: '0'<br>Only show when morbidity_3 = 1<br>If '1', clear morbidity_3_1 to morbidity_3_3 |
| morbidity_4_1                                                                                                                                                                                                                                                                                                                |                    | 26 Diabetes: chronic disease                            | 1: Yes<br>0: No |      | Default: '0'<br>Only show when morbidity_4 = 1                                                 |
| morbidity_4_2                                                                                                                                                                                                                                                                                                                |                    | 26 Diabetes: regular medication intake                  | 1: Yes<br>0: No |      | Default: '0'<br>Only show when morbidity_4 = 1                                                 |
| morbidity_4_3                                                                                                                                                                                                                                                                                                                |                    | 26 Diabetes: regular physician visits                   | 1: Yes<br>0: No |      | Default: '0'<br>Only show when morbidity_4 = 1                                                 |
| morbidity_4_0                                                                                                                                                                                                                                                                                                                |                    | 26 Diabetes: none of the above                          | 1: Yes<br>0: No |      | Default: '0'<br>Only show when morbidity_4 = 1<br>If '1', clear morbidity_4_1 to morbidity_4_3 |
| morbidity_5_1                                                                                                                                                                                                                                                                                                                |                    | 26 Gastrointestinal problems: chronic disease           | 1: Yes<br>0: No |      | Default: '0'<br>Only show when morbidity_5 = 1                                                 |
| morbidity_5_2                                                                                                                                                                                                                                                                                                                |                    | 26 Gastrointestinal problems: regular medication intake | 1: Yes<br>0: No |      | Default: '0'<br>Only show when morbidity_5 = 1                                                 |
| morbidity_5_3                                                                                                                                                                                                                                                                                                                |                    | 26 Gastrointestinal problems: regular physician visits  | 1: Yes<br>0: No |      | Default: '0'<br>Only show when morbidity_5 = 1                                                 |

| Variable       | Questionnaire Item | Description                                     | Values          | Type | Rules                                                                                             |
|----------------|--------------------|-------------------------------------------------|-----------------|------|---------------------------------------------------------------------------------------------------|
| morbidity_5_0  | 26                 | Gastrointestinal problems: none of the above    | 1: Yes<br>0: No |      | Default: '0'<br>Only show when morbidity_5 = 1<br>If '1', clear morbidity_5_1 to morbidity_5_3    |
| morbidity_6_1  | 26                 | Kidney problems: chronic disease                | 1: Yes<br>0: No |      | Default: '0'<br>Only show when morbidity_6 = 1                                                    |
| morbidity_6_2  | 26                 | Kidney problems: regular medication intake      | 1: Yes<br>0: No |      | Default: '0'<br>Only show when morbidity_6 = 1                                                    |
| morbidity_6_3  | 26                 | Kidney problems: regular physician visits       | 1: Yes<br>0: No |      | Default: '0'<br>Only show when morbidity_6 = 1                                                    |
| morbidity_6_0  | 26                 | Kidney problems: none of the above              | 1: Yes<br>0: No |      | Default: '0'<br>Only show when morbidity_6 = 1<br>If '1', clear morbidity_6_1 to morbidity_6_3    |
| morbidity_7_1  | 26                 | Liver problems: chronic disease                 | 1: Yes<br>0: No |      | Default: '0'<br>Only show when morbidity_7 = 1                                                    |
| morbidity_7_2  | 26                 | Liver problems: regular medication intake       | 1: Yes<br>0: No |      | Default: '0'<br>Only show when morbidity_7 = 1                                                    |
| morbidity_7_3  | 26                 | Liver problems: regular physician visits        | 1: Yes<br>0: No |      | Default: '0'<br>Only show when morbidity_7 = 1                                                    |
| morbidity_7_0  | 26                 | Liver problems: none of the above               | 1: Yes<br>0: No |      | Default: '0'<br>Only show when morbidity_7 = 1<br>If '1', clear morbidity_7_1 to morbidity_7_3    |
| morbidity_8_1  | 26                 | Anemia: chronic disease                         | 1: Yes<br>0: No |      | Default: '0'<br>Only show when morbidity_8 = 1                                                    |
| morbidity_8_2  | 26                 | Anemia: regular medication intake               | 1: Yes<br>0: No |      | Default: '0'<br>Only show when morbidity_8 = 1                                                    |
| morbidity_8_3  | 26                 | Anemia: regular physician visits                | 1: Yes<br>0: No |      | Default: '0'<br>Only show when morbidity_8 = 1                                                    |
| morbidity_8_0  | 26                 | Anemia: none of the above                       | 1: Yes<br>0: No |      | Default: '0'<br>Only show when morbidity_8 = 1<br>If '1', clear morbidity_8_1 to morbidity_8_3    |
| morbidity_9_1  | 26                 | Coagulation disorder: chronic disease           | 1: Yes<br>0: No |      | Default: '0'<br>Only show when morbidity_9 = 1                                                    |
| morbidity_9_2  | 26                 | Coagulation disorder: regular medication intake | 1: Yes<br>0: No |      | Default: '0'<br>Only show when morbidity_9 = 1                                                    |
| morbidity_9_3  | 26                 | Coagulation disorder: regular physician visits  | 1: Yes<br>0: No |      | Default: '0'<br>Only show when morbidity_9 = 1                                                    |
| morbidity_9_0  | 26                 | Coagulation disorder: none of the above         | 1: Yes<br>0: No |      | Default: '0'<br>Only show when morbidity_9 = 1<br>If '1', clear morbidity_9_1 to morbidity_9_3    |
| morbidity_10_1 | 26                 | Cancer: chronic disease                         | 1: Yes<br>0: No |      | Default: '0'<br>Only show when morbidity_10 = 1                                                   |
| morbidity_10_2 | 26                 | Cancer: regular medication intake               | 1: Yes<br>0: No |      | Default: '0'<br>Only show when morbidity_10 = 1                                                   |
| morbidity_10_3 | 26                 | Cancer: regular physician visits                | 1: Yes<br>0: No |      | Default: '0'<br>Only show when morbidity_10 = 1                                                   |
| morbidity_10_0 | 26                 | Cancer: none of the above                       | 1: Yes<br>0: No |      | Default: '0'<br>Only show when morbidity_10 = 1<br>If '1', clear morbidity_10_1 to morbidity_10_3 |
| morbidity_11_1 | 26                 | Depression: chronic disease                     | 1: Yes<br>0: No |      | Default: '0'<br>Only show when morbidity_11 = 1                                                   |
| morbidity_11_2 | 26                 | Depression: regular medication intake           | 1: Yes<br>0: No |      | Default: '0'<br>Only show when morbidity_11 = 1                                                   |
| morbidity_11_3 | 26                 | Depression: regular physician visits            | 1: Yes<br>0: No |      | Default: '0'<br>Only show when morbidity_11 = 1                                                   |
| morbidity_11_0 | 26                 | Depression: none of the above                   | 1: Yes<br>0: No |      | Default: '0'<br>Only show when morbidity_11 = 1<br>If '1', clear morbidity_11_1 to morbidity_11_3 |
| morbidity_12_1 | 26                 | Arthrosis: chronic disease                      | 1: Yes<br>0: No |      | Default: '0'<br>Only show when morbidity_12 = 1                                                   |

| Variable                                                                                                                                                                                                                    | Questionnaire Item | Description                                                                                                                      | Values          | Type            | Rules                                                                                             |
|-----------------------------------------------------------------------------------------------------------------------------------------------------------------------------------------------------------------------------|--------------------|----------------------------------------------------------------------------------------------------------------------------------|-----------------|-----------------|---------------------------------------------------------------------------------------------------|
| morbidity_12_2                                                                                                                                                                                                              | 26                 | Arthritis: regular medication intake                                                                                             | 1: Yes<br>0: No |                 | Default: '0'<br>Only show when morbidity_12 = 1                                                   |
| morbidity_12_3                                                                                                                                                                                                              | 26                 | Arthritis: regular physician visits                                                                                              | 1: Yes<br>0: No |                 | Default: '0'<br>Only show when morbidity_12 = 1                                                   |
| morbidity_12_0                                                                                                                                                                                                              | 26                 | Arthritis: none of the above                                                                                                     | 1: Yes<br>0: No |                 | Default: '0'<br>Only show when morbidity_12 = 1<br>If '1', clear morbidity_12_1 to morbidity_12_3 |
| morbidity_13_1                                                                                                                                                                                                              | 26                 | Back pain: chronic disease                                                                                                       | 1: Yes<br>0: No |                 | Default: '0'<br>Only show when morbidity_13 = 1                                                   |
| morbidity_13_2                                                                                                                                                                                                              | 26                 | Back pain: regular medication intake                                                                                             | 1: Yes<br>0: No |                 | Default: '0'<br>Only show when morbidity_13 = 1                                                   |
| morbidity_13_3                                                                                                                                                                                                              | 26                 | Back pain: regular physician visits                                                                                              | 1: Yes<br>0: No |                 | Default: '0'<br>Only show when morbidity_13 = 1                                                   |
| morbidity_13_0                                                                                                                                                                                                              | 26                 | Back pain: none of the above                                                                                                     | 1: Yes<br>0: No |                 | Default: '0'<br>Only show when morbidity_13 = 1<br>If '1', clear morbidity_13_1 to morbidity_13_3 |
| morbidity_14_1                                                                                                                                                                                                              | 26                 | Rheumatism or autoimmune disorder: chronic disease                                                                               | 1: Yes<br>0: No |                 | Default: '0'<br>Only show when morbidity_14 = 1                                                   |
| morbidity_14_2                                                                                                                                                                                                              | 26                 | Rheumatism or autoimmune disorder: regular medication intake                                                                     | 1: Yes<br>0: No |                 | Default: '0'<br>Only show when morbidity_14 = 1                                                   |
| morbidity_14_3                                                                                                                                                                                                              | 26                 | Rheumatism or autoimmune disorder: regular physician visits                                                                      | 1: Yes<br>0: No |                 | Default: '0'<br>Only show when morbidity_14 = 1                                                   |
| morbidity_14_0                                                                                                                                                                                                              | 26                 | Rheumatism or autoimmune disorder: none of the above                                                                             | 1: Yes<br>0: No |                 | Default: '0'<br>Only show when morbidity_14 = 1<br>If '1', clear morbidity_14_1 to morbidity_14_3 |
| morbidity_15_1                                                                                                                                                                                                              | 26                 | Allergies: chronic disease                                                                                                       | 1: Yes<br>0: No |                 | Default: '0'<br>Only show when morbidity_15 = 1                                                   |
| morbidity_15_2                                                                                                                                                                                                              | 26                 | Allergies: regular medication intake                                                                                             | 1: Yes<br>0: No |                 | Default: '0'<br>Only show when morbidity_15 = 1                                                   |
| morbidity_15_3                                                                                                                                                                                                              | 26                 | Allergies: regular physician visits                                                                                              | 1: Yes<br>0: No |                 | Default: '0'<br>Only show when morbidity_15 = 1                                                   |
| morbidity_15_0                                                                                                                                                                                                              | 26                 | Allergies: none of the above                                                                                                     | 1: Yes<br>0: No |                 | Default: '0'<br>Only show when morbidity_15 = 1<br>If '1', clear morbidity_15_1 to morbidity_15_3 |
| morbidity_16_1                                                                                                                                                                                                              | 26                 | Thyroid disease: chronic disease                                                                                                 | 1: Yes<br>0: No |                 | Default: '0'<br>Only show when morbidity_16 = 1                                                   |
| morbidity_16_2                                                                                                                                                                                                              | 26                 | Thyroid disease: regular medication intake                                                                                       | 1: Yes<br>0: No |                 | Default: '0'<br>Only show when morbidity_16 = 1                                                   |
| morbidity_16_3                                                                                                                                                                                                              | 26                 | Thyroid disease: regular physician visits                                                                                        | 1: Yes<br>0: No |                 | Default: '0'<br>Only show when morbidity_16 = 1                                                   |
| morbidity_16_0                                                                                                                                                                                                              | 26                 | Tyroid disorder: none of the above                                                                                               | 1: Yes<br>0: No |                 | Default: '0'<br>Only show when morbidity_16 = 1<br>If '1', clear morbidity_16_1 to morbidity_16_3 |
| <b>Thank you for participating in our survey. With your help, we will gain a better understanding of what the population understands by medical overuse and where to start in order to reduce and avoid the phenomenon.</b> |                    |                                                                                                                                  |                 |                 |                                                                                                   |
| end_2a                                                                                                                                                                                                                      | 27                 | If you would like to make any further comments, you now have the opportunity to do so. Please use the following window for this. |                 | Free text field |                                                                                                   |
| studie_zu_berversorgung_fb_complete                                                                                                                                                                                         |                    | Questionnaire complete?                                                                                                          | 2: Yes          |                 |                                                                                                   |
